# Supplementary material
Source: publisher figshare collection journal article supplement (https://frontiersin.figshare.com/ndownloader/files/28986600)
Supplement: Supplementary file [file 28986600]

## *Supplementary Material*

### **ANNEX 3: QUESTIONNAIRE RELATING TO THE USE OF MANAGEMENT INDICATORS IN NON-PROFIT ORGANIZATIONS (NPOs).**

ANALYZED NPO: ONCE

DIRECTED TO: TERRITORIAL DELEGATION, AREA DIRECTORATE and SUPPORT DIRECTORATE

(COMPLIANCE IS REQUESTED BY THE HEADS OF CENTER OR, WHERE CASE, THOSE WHO CONSIDER BETTER)

#### **QUESTIONNAIRE:**

1. THE CENTER IS:

- ☐ TERRITORIAL DELEGATION
- ☐ AREA DIRECTORATE
- ☐ SUPPORT DIRECTORATE

2. POSITION WITHIN THE CENTER OF THE PERSON RESPONDING TO THIS SURVEY:

- ☐ CENTER DIRECTOR
- ☐ RESPONSIBLE FOR SOCIAL SERVICES FOR MEMBERS
- ☐ OTHERS

3. PLEASE, INDICATE THE NUMBER OF YEARS YOU HAVE BEEN AS A MANAGER OR MIDDLE MANAGER AT ONCE: \_\_\_\_\_

4. NUMBER OF AFFILIATES ASSOCIATED WITH THE CENTER (In the case of an Area Directorate, those of the Support Directorates will be excluded. If it is a Territorial Delegation, those of the Area Directorates and those of the Support Directorates will be excluded): \_\_\_\_\_

5. NUMBER OF WORKERS AT THE CENTER (INCLUDING AGENCIES):

- NON-SELLERS: \_\_\_\_\_
- SELLERS: \_\_\_\_\_

6. NUMBER OF NON-SELLER WORKERS ASSOCIATED WITH THE SOCIAL AREAS DEPARTMENT:

- ADMINISTRATIVES: \_\_\_\_\_
- TECHNICIANS: \_\_\_\_\_

7. AMOUNT OF THE APPROVED EXPENDITURE BUDGET:

- FUNCTION 2: \_\_\_\_\_
- TOTAL CENTER, INCLUDING FUNCTION 2: \_\_\_\_\_

8. IF YOU PREPARE ANY TYPE OF INDICATOR, WITH THE PURPOSE OF EVALUATING THE MANAGEMENT RELATED TO FUNCTION 2: WRITE THE INDICATOR AND ITS PURPOSE OF THE INDICATOR. PLEASE COMPLE THE TABLE WITH ALL THE MANAGEMENT INDICATORS THAT YOU USE, EVEN IF IT IS SPORADELY, FOR EACH OF THE AREAS INDICATED BELOW:

| AREA                                                                                    | INDICATOR | PURPOSE |
|-----------------------------------------------------------------------------------------|-----------|---------|
| DIRECT EDUCATIONAL CARE<br>COMPLEMENTARY SUPPORT                                        |           |         |
| ECONOMIC BENEFITS                                                                       |           |         |
| SUPPORT FOR EMPLOYMENT                                                                  |           |         |
| COMPREHENSIVE<br>REHABILITATION                                                         |           |         |
| AFFILIATION                                                                             |           |         |
| SOCIOCULTURAL AND SPORTS<br>ACTIVITIES                                                  |           |         |
| PRODUCTION,<br>COMMERCIALIZATION AND<br>REPAIR OF THE<br>TIFLOTECHNOLOGICAL<br>MATERIAL |           |         |

9. A BATTERY OF INDICATORS IS DETAILED BELLOW. THIS BATTERY IS THE RESULT OF AN ANALYSIS ATHORS PERFORMED ON IMPROVEMENTS FOR THE MANAGEMENT PARTICULARIZED AT ONCE. ASSESS, ON A SCALE OF 1 TO 5, BOTH THE “UTILITY” THE INDICATOR COULD HAVE FOR THE MANAGEMENT, AS THE “EASE OF IMPLEMENTATION”.

IN THE REFERRED SCALE, 5 IS THE MAXIMUM OR MOST POSITIVE VALUE (MAXIMUM PROFIT / MAXIMUM EASE OF IMPLEMENTATION) AND 1 IS THE MINIMUM OR MOST NEGATIVE VALUE (NULL UTILITY / NO EASE OF IMPLEMENTATION).

| No.                                                                 | INDICATOR                                                                                        | UTILITY |   |   |   |   | EASE OF IMPLEMENTATION |   |   |   |   |
|---------------------------------------------------------------------|--------------------------------------------------------------------------------------------------|---------|---|---|---|---|------------------------|---|---|---|---|
|                                                                     |                                                                                                  | 1       | 2 | 3 | 4 | 5 | 1                      | 2 | 3 | 4 | 5 |
| I. INDICATORS OF DIRECT EDUCATIONAL CARE AND COMPLEMENTARY SUPPORT: |                                                                                                  |         |   |   |   |   |                        |   |   |   |   |
| A. - ECONOMY AND INPUTS                                             |                                                                                                  |         |   |   |   |   |                        |   |   |   |   |
| 1                                                                   | - Total costs of educational care staff/No. of persons employed                                  |         |   |   |   |   |                        |   |   |   |   |
| 2                                                                   | - Total costs of the educational care dimension/No. of affiliates of the centre                  |         |   |   |   |   |                        |   |   |   |   |
| 3                                                                   | - Total costs of the educational care dimension/No. of affiliates of the centre in school age    |         |   |   |   |   |                        |   |   |   |   |
| B. - EFFECTIVENESS AND OUTPUTS                                      |                                                                                                  |         |   |   |   |   |                        |   |   |   |   |
| 4                                                                   | - No. of users served in the educational care dimension/No. of potential users in said dimension |         |   |   |   |   |                        |   |   |   |   |
| 5                                                                   | - Expenses of the educational care dimension/Budgeted expenses in said dimension                 |         |   |   |   |   |                        |   |   |   |   |
| 6                                                                   | - No. of users served in the educational care dimension/No. of affiliates of the centre          |         |   |   |   |   |                        |   |   |   |   |
| 7                                                                   | - No. of users served in the educational care dimension/No. of school-age affiliates             |         |   |   |   |   |                        |   |   |   |   |
| C. - EFFICIENCY AND PROCESSES                                       |                                                                                                  |         |   |   |   |   |                        |   |   |   |   |
| 8                                                                   | - No. of users served in the educational care dimension/No. of people employed in this task      |         |   |   |   |   |                        |   |   |   |   |
| 9                                                                   | - No. of students of the integrated teaching course/No. of teachers                              |         |   |   |   |   |                        |   |   |   |   |
| 10                                                                  | - No. of users served in the educational dimension dimension/Staff costs                         |         |   |   |   |   |                        |   |   |   |   |
| 11                                                                  | - No. of users served in the educational care dimension/Total costs                              |         |   |   |   |   |                        |   |   |   |   |
| D. - EXCELLENCE                                                     |                                                                                                  |         |   |   |   |   |                        |   |   |   |   |
| 12                                                                  | - No. of workers employed in the educational care dimension/No. of school-age affiliates         |         |   |   |   |   |                        |   |   |   |   |
| 13                                                                  | - No. of claims in relation to the educational care dimension/No. of affiliates                  |         |   |   |   |   |                        |   |   |   |   |
| 14                                                                  | - Score obtained on surveys by the educational care dimension                                    |         |   |   |   |   |                        |   |   |   |   |
| 15                                                                  | - Average No of days elapsed from when the service is requested until it is provided             |         |   |   |   |   |                        |   |   |   |   |
| 16                                                                  | - No. of attention sessions received/Nº of school days                                           |         |   |   |   |   |                        |   |   |   |   |
| 17                                                                  | - No. of suspended students/Total nº of students                                                 |         |   |   |   |   |                        |   |   |   |   |
| 18                                                                  | - No. students who drop out/total number of students                                             |         |   |   |   |   |                        |   |   |   |   |

| No.                                  | INDICATOR                                                                                       | UTILITY |   |   |   |   | EASE OF IMPLEMENTATION |   |   |   |   |
|--------------------------------------|-------------------------------------------------------------------------------------------------|---------|---|---|---|---|------------------------|---|---|---|---|
|                                      |                                                                                                 | 1       | 2 | 3 | 4 | 5 | 1                      | 2 | 3 | 4 | 5 |
| II. INDICATORS OF ECONOMIC BENEFITS: |                                                                                                 |         |   |   |   |   |                        |   |   |   |   |
| A.- ECONOMY AND INPUTS               |                                                                                                 |         |   |   |   |   |                        |   |   |   |   |
| 19                                   | - Total costs of the staff of the economic benefits dimension/No. of persons employed           |         |   |   |   |   |                        |   |   |   |   |
| 20                                   | - Total costs of the economic benefits dimension/No. of affiliates of the centre                |         |   |   |   |   |                        |   |   |   |   |
| B.- EFFECTIVENESS AND OUTPUTS        |                                                                                                 |         |   |   |   |   |                        |   |   |   |   |
| 21                                   | - No. of users served in the economic benefits dimension/Planned no. of users in said dimension |         |   |   |   |   |                        |   |   |   |   |
| 22                                   | - No. of services processed/No. of requests foreseen                                            |         |   |   |   |   |                        |   |   |   |   |
| 23                                   | - Expenses of the economic benefits dimension/Budgeted expenses in said dimension               |         |   |   |   |   |                        |   |   |   |   |
| 24                                   | - No. of users served in the economic benefits dimension/No. of affiliates of the centre        |         |   |   |   |   |                        |   |   |   |   |
| C.- EFFICIENCY AND PROCESSES         |                                                                                                 |         |   |   |   |   |                        |   |   |   |   |
| 25                                   | - No. of users served in the economic benefits dimension/No. of people employed in this task    |         |   |   |   |   |                        |   |   |   |   |
| 26                                   | - No. of users served in the economic benefits dimension/Staff costs                            |         |   |   |   |   |                        |   |   |   |   |
| 27                                   | - No. of users served in the economic benefits dimension/Total costs                            |         |   |   |   |   |                        |   |   |   |   |
| D.- EXCELLENCE                       |                                                                                                 |         |   |   |   |   |                        |   |   |   |   |
| 28                                   | - No. of workers employed in the economic benefits dimension/No. of affiliates of the centre    |         |   |   |   |   |                        |   |   |   |   |
| 29                                   | - No. of claims in relation to the economic benefits dimension/No. of affiliates                |         |   |   |   |   |                        |   |   |   |   |
| 30                                   | - Score obtained on surveys by the economic benefits dimension                                  |         |   |   |   |   |                        |   |   |   |   |
| 31                                   | - Average no. of days elapsed from the request for the benefit until it is resolved             |         |   |   |   |   |                        |   |   |   |   |
| 32                                   | - Average no. of days elapsed from the date the benefit is granted until the member is paid     |         |   |   |   |   |                        |   |   |   |   |

| No.                                    | INDICATOR                                                                                                                          | UTILITY |   |   |   |   | EASE OF IMPLEMENTATION |   |   |   |   |
|----------------------------------------|------------------------------------------------------------------------------------------------------------------------------------|---------|---|---|---|---|------------------------|---|---|---|---|
|                                        |                                                                                                                                    | 1       | 2 | 3 | 4 | 5 | 1                      | 2 | 3 | 4 | 5 |
| III. INDICATORS OF EMPLOYMENT SUPPORT: |                                                                                                                                    |         |   |   |   |   |                        |   |   |   |   |
| A.- ECONOMY AND INPUTS                 |                                                                                                                                    |         |   |   |   |   |                        |   |   |   |   |
| 33                                     | - Total costs of employment support staff/No. of persons employed                                                                  |         |   |   |   |   |                        |   |   |   |   |
| 34                                     | - Total costs of the employment support dimension/No. of affiliates of the centre                                                  |         |   |   |   |   |                        |   |   |   |   |
| B.- EFFECTIVENESS AND OUTPUTS          |                                                                                                                                    |         |   |   |   |   |                        |   |   |   |   |
| 35                                     | - Number of users                                                                                                                  |         |   |   |   |   |                        |   |   |   |   |
| 36                                     | - Expenses of the employment support dimension/Budgeted expenses in said dimension                                                 |         |   |   |   |   |                        |   |   |   |   |
| 37                                     | - No. of users served in the employment support dimension/No. of affiliates of the centre                                          |         |   |   |   |   |                        |   |   |   |   |
| 38                                     | - No. of users served in the employment support dimension/No. of affiliates of the centre who seek employment                      |         |   |   |   |   |                        |   |   |   |   |
| C.- EFFICIENCY AND PROCESSES           |                                                                                                                                    |         |   |   |   |   |                        |   |   |   |   |
| 39                                     | - No. of users served in the employment support dimension/No. of people employed in this task                                      |         |   |   |   |   |                        |   |   |   |   |
| 40                                     | - No. of users served in the employment support dimension/Staff costs                                                              |         |   |   |   |   |                        |   |   |   |   |
| 41                                     | - No. of users served in the employment support dimension/Total costs                                                              |         |   |   |   |   |                        |   |   |   |   |
| D.- EXCELLENCE                         |                                                                                                                                    |         |   |   |   |   |                        |   |   |   |   |
| 42                                     | - No. of workers employed in the employment support dimension/No. of affiliates of the centre                                      |         |   |   |   |   |                        |   |   |   |   |
| 43                                     | - No. of claims in relation to the employment support dimension/No. of affiliates                                                  |         |   |   |   |   |                        |   |   |   |   |
| 44                                     | - Survey scores of the employment support dimension                                                                                |         |   |   |   |   |                        |   |   |   |   |
| 45                                     | - Average no. of days elapsed from the moment the individual accesses the employment support dimension until he or she finds a job |         |   |   |   |   |                        |   |   |   |   |
| 46                                     | - Average no. of days elapsed from the request for the benefit until it is resolved                                                |         |   |   |   |   |                        |   |   |   |   |
| 47                                     | - Average no. of days elapsed from the date the benefit is granted until the member is paid                                        |         |   |   |   |   |                        |   |   |   |   |

|                                              | INDICATOR                                                                                                                  | UTILITY |   |   |   |   | EASE OF IMPLEMENTATION |   |   |   |   |
|----------------------------------------------|----------------------------------------------------------------------------------------------------------------------------|---------|---|---|---|---|------------------------|---|---|---|---|
| No.                                          |                                                                                                                            | 1       | 2 | 3 | 4 | 5 | 1                      | 2 | 3 | 4 | 5 |
| IV. COMPREHENSIVE REHABILITATION INDICATORS: |                                                                                                                            |         |   |   |   |   |                        |   |   |   |   |
| A.- ECONOMY AND INPUTS                       |                                                                                                                            |         |   |   |   |   |                        |   |   |   |   |
| 48                                           | - Total costs of comprehensive rehabilitation staff/No. of people employed                                                 |         |   |   |   |   |                        |   |   |   |   |
| 49                                           | - Total costs of the comprehensive rehabilitation service/No. of affiliates of the centre                                  |         |   |   |   |   |                        |   |   |   |   |
| B.- EFFECTIVENESS AND OUTPUTS                |                                                                                                                            |         |   |   |   |   |                        |   |   |   |   |
| 50                                           | - No. of users served in the comprehensive rehabilitation service/No. of users provided for in said service                |         |   |   |   |   |                        |   |   |   |   |
| 51                                           | - Expenses of the comprehensive rehabilitation service/Costs budgeted in said service                                      |         |   |   |   |   |                        |   |   |   |   |
| 52                                           | - No. of users served in the comprehensive rehabilitation service/No. of affiliates of the centre                          |         |   |   |   |   |                        |   |   |   |   |
| 53                                           | - No. of users served in the comprehensive rehabilitation service/No. of affiliates of the centre who request said service |         |   |   |   |   |                        |   |   |   |   |
| C.- EFFICIENCY AND PROCESSES                 |                                                                                                                            |         |   |   |   |   |                        |   |   |   |   |
| 54                                           | - No. of users served in the comprehensive rehabilitation service/No. of people employed in this task                      |         |   |   |   |   |                        |   |   |   |   |
| 55                                           | - No. of users served in the comprehensive rehabilitation service/Staff costs                                              |         |   |   |   |   |                        |   |   |   |   |
| 56                                           | - No. of users served in the comprehensive rehabilitation service/Total costs                                              |         |   |   |   |   |                        |   |   |   |   |
| D.- EXCELLENCE                               |                                                                                                                            |         |   |   |   |   |                        |   |   |   |   |
| 57                                           | - No. of workers employed in the comprehensive rehabilitation service/No. of affiliates of the centre                      |         |   |   |   |   |                        |   |   |   |   |
| 58                                           | - No. of claims in relation to the comprehensive rehabilitation service/No. of affiliates                                  |         |   |   |   |   |                        |   |   |   |   |
| 59                                           | - Survey scores of the comprehensive rehabilitation service dimension                                                      |         |   |   |   |   |                        |   |   |   |   |
| 60                                           | - Average no. of days elapsed from the request for the comprehensive rehabilitation service until the care begins          |         |   |   |   |   |                        |   |   |   |   |

| No.                           | INDICATOR                                                                                             | UTILITY |   |   |   |   | EASE OF IMPLEMENTATION |   |   |   |   |
|-------------------------------|-------------------------------------------------------------------------------------------------------|---------|---|---|---|---|------------------------|---|---|---|---|
|                               |                                                                                                       | 1       | 2 | 3 | 4 | 5 | 1                      | 2 | 3 | 4 | 5 |
| V. AFFILIATION INDICATORS:    |                                                                                                       |         |   |   |   |   |                        |   |   |   |   |
| A.- ECONOMY AND INPUTS        |                                                                                                       |         |   |   |   |   |                        |   |   |   |   |
| 61                            | - Total costs of affiliation staff/No. of persons employed                                            |         |   |   |   |   |                        |   |   |   |   |
| 62                            | - Total costs of the affiliation dimension/No. of affiliates of the centre                            |         |   |   |   |   |                        |   |   |   |   |
| B.- EFFECTIVENESS AND OUTPUTS |                                                                                                       |         |   |   |   |   |                        |   |   |   |   |
| 63                            | - No. of users served in the affiliation dimension/Planned no. of users in said dimension             |         |   |   |   |   |                        |   |   |   |   |
| 64                            | - Expenses of the affiliation dimension/Budgeted expenses in said dimension                           |         |   |   |   |   |                        |   |   |   |   |
| 65                            | - No. of users served in the affiliation dimension/No. of affiliates of the centre                    |         |   |   |   |   |                        |   |   |   |   |
| 66                            | - No. of users served in the affiliation dimension/No. of affiliation requests                        |         |   |   |   |   |                        |   |   |   |   |
| C.- EFFICIENCY AND PROCESSES  |                                                                                                       |         |   |   |   |   |                        |   |   |   |   |
| 67                            | - No. of users served in the affiliation dimension/No. of people employed in this task                |         |   |   |   |   |                        |   |   |   |   |
| 68                            | - No. of users served in the affiliation dimension/Staff costs                                        |         |   |   |   |   |                        |   |   |   |   |
| 69                            | - No. of users served in the affiliation dimension/Total costs                                        |         |   |   |   |   |                        |   |   |   |   |
| D.- EXCELLENCE                |                                                                                                       |         |   |   |   |   |                        |   |   |   |   |
| 70                            | - No. of workers employed in the affiliation dimension/No. of affiliates of the centre                |         |   |   |   |   |                        |   |   |   |   |
| 71                            | - No. of claims in relation to the affiliation dimension/No. of affiliation files processed in a year |         |   |   |   |   |                        |   |   |   |   |
| 72                            | - Survey scores of the affiliation dimension                                                          |         |   |   |   |   |                        |   |   |   |   |
| 73                            | - Average no. of days elapsed from when the affiliation is requested until it is resolved             |         |   |   |   |   |                        |   |   |   |   |

| No.                                                    | INDICATOR                                                                                                                                   | UTILITY |   |   |   |   | EASE OF IMPLEMENTATION |   |   |   |   |
|--------------------------------------------------------|---------------------------------------------------------------------------------------------------------------------------------------------|---------|---|---|---|---|------------------------|---|---|---|---|
|                                                        |                                                                                                                                             | 1       | 2 | 3 | 4 | 5 | 1                      | 2 | 3 | 4 | 5 |
| VI. INDICATORS OF SOCIOCULTURAL AND SPORTS ACTIVITIES: |                                                                                                                                             |         |   |   |   |   |                        |   |   |   |   |
| A.- ECONOMY AND INPUTS                                 |                                                                                                                                             |         |   |   |   |   |                        |   |   |   |   |
| 74                                                     | - Total costs of sociocultural and sports activities staff/No. of people employed                                                           |         |   |   |   |   |                        |   |   |   |   |
| 75                                                     | - Total costs of the sociocultural and sports activities dimension/No. of affiliates centre                                                 |         |   |   |   |   |                        |   |   |   |   |
| B.- EFFECTIVENESS AND OUTPUTS                          |                                                                                                                                             |         |   |   |   |   |                        |   |   |   |   |
| 76                                                     | - No. of users served in the sociocultural and sports activities dimension/Planned no. of users in said dimension                           |         |   |   |   |   |                        |   |   |   |   |
| 77                                                     | - No. of activities carried out/No. of activities scheduled                                                                                 |         |   |   |   |   |                        |   |   |   |   |
| 78                                                     | - No. of places where activity X is offered/Planned No. of places where activity X is offered                                               |         |   |   |   |   |                        |   |   |   |   |
| 79                                                     | - Expenses sociocultural and sports activities dimension/Budgeted expenses dimension                                                        |         |   |   |   |   |                        |   |   |   |   |
| 80                                                     | - No. of users served in the sociocultural and sports activities dimension/No. of affiliates                                                |         |   |   |   |   |                        |   |   |   |   |
| 81                                                     | - No. of users served in the sociocultural and sports activities dimension/No. of affiliates who request to participate in these activities |         |   |   |   |   |                        |   |   |   |   |
| C.- EFFICIENCY AND PROCESSES                           |                                                                                                                                             |         |   |   |   |   |                        |   |   |   |   |
| 82                                                     | - No. of users served in the sociocultural and sports activities dimension/No. of people employed in this task                              |         |   |   |   |   |                        |   |   |   |   |
| 83                                                     | - No. of users served in the sociocultural and sports activities dimension/Staff costs                                                      |         |   |   |   |   |                        |   |   |   |   |
| 84                                                     | - No. of users served in the sociocultural and sports activities dimension/Total costs                                                      |         |   |   |   |   |                        |   |   |   |   |
| D.- EXCELLENCE                                         |                                                                                                                                             |         |   |   |   |   |                        |   |   |   |   |
| 85                                                     | - No. of workers employed in the sociocultural and sports activities dimension/No. of affiliates of the centre                              |         |   |   |   |   |                        |   |   |   |   |
| 86                                                     | - No. of claims in relation to the sociocultural and sports activities dimension/No. affiliates                                             |         |   |   |   |   |                        |   |   |   |   |
| 87                                                     | - Survey scores of the sociocultural and sports activities dimension                                                                        |         |   |   |   |   |                        |   |   |   |   |
| 88                                                     | - No. of users of the activities in the sociocultural and sports activities dimension/No. members of the centre                             |         |   |   |   |   |                        |   |   |   |   |
| 89                                                     | Number of new activities this year / Number total activities organized in the previous year                                                 |         |   |   |   |   |                        |   |   |   |   |
| 90                                                     | - No. of activities 100% covered/No. of activities organized                                                                                |         |   |   |   |   |                        |   |   |   |   |
| 91                                                     | - No. activities organized/No. activities proposed by members                                                                               |         |   |   |   |   |                        |   |   |   |   |
| 92                                                     | - No. of activities proposed in the current year/No. activities proposed in the previous year                                               |         |   |   |   |   |                        |   |   |   |   |



| No.                           | INDICATOR                                                                                                                                                | UTILITY |   |   |   |   | EASE OF IMPLEMENTATION |   |   |   |   |
|-------------------------------|----------------------------------------------------------------------------------------------------------------------------------------------------------|---------|---|---|---|---|------------------------|---|---|---|---|
|                               |                                                                                                                                                          | 1       | 2 | 3 | 4 | 5 | 1                      | 2 | 3 | 4 | 5 |
| A.- ECONOMY AND INPUTS        |                                                                                                                                                          |         |   |   |   |   |                        |   |   |   |   |
| 93                            | - Total costs of production, commercialization and repair of tflotechnological material personnel/No. of persons employed                                |         |   |   |   |   |                        |   |   |   |   |
| 94                            | - Total costs of the production, commercialization and repair of tflotechnological material dimension/No. of affiliates of the centre                    |         |   |   |   |   |                        |   |   |   |   |
| B.- EFFECTIVENESS AND OUTPUTS |                                                                                                                                                          |         |   |   |   |   |                        |   |   |   |   |
| 95                            | - No. of users served in the production, commercialization and repair of tflotechnological material dimension/Planned no. of users in said dimension     |         |   |   |   |   |                        |   |   |   |   |
| 96                            | - Expenses of the production, commercialization and repair of tflotechnological material dimension/Budgeted expenses in said dimension                   |         |   |   |   |   |                        |   |   |   |   |
| 97                            | - No. of users served in the production, commercialization and repair of tflotechnological material dimension/No. of affiliates of the centre            |         |   |   |   |   |                        |   |   |   |   |
| C.- EFFICIENCY AND PROCESSES  |                                                                                                                                                          |         |   |   |   |   |                        |   |   |   |   |
| 98                            | - No. of users served in the production, commercialization and repair of tflotechnological material dimension/No. of people employed in this task        |         |   |   |   |   |                        |   |   |   |   |
| 99                            | - No. of users served in the production, commercialization and repair of tflotechnological material dimension/Staff costs                                |         |   |   |   |   |                        |   |   |   |   |
| 100                           | - No. of users served in the production, commercialization and repair of tflotechnological material dimension/Total costs                                |         |   |   |   |   |                        |   |   |   |   |
| 101                           | - No. units sold/Total costs                                                                                                                             |         |   |   |   |   |                        |   |   |   |   |
| 102                           | - No. of repairs carried out/Total costs                                                                                                                 |         |   |   |   |   |                        |   |   |   |   |
| D.- EXCELLENCE                |                                                                                                                                                          |         |   |   |   |   |                        |   |   |   |   |
| 103                           | - No. of workers employed in the production, commercialization and repair of tflotechnological material dimension/No. of affiliates of the centre        |         |   |   |   |   |                        |   |   |   |   |
| 104                           | - No. of claims in relation to the production, commercialization and repair of tflotechnological material dimension/No. of affiliates (in hundreds)      |         |   |   |   |   |                        |   |   |   |   |
| 105                           | - Confidential survey scores of the production, commercialization and repair of tflotechnological material dimension                                     |         |   |   |   |   |                        |   |   |   |   |
| 106                           | - No. of users of the activities in the production, commercialization and repair of tflotechnological material dimension/No. of affiliates of the centre |         |   |   |   |   |                        |   |   |   |   |
| 107                           | - No. of units sold/Average stock in exhibition store                                                                                                    |         |   |   |   |   |                        |   |   |   |   |
| 108                           | - No. of units repaired/No. affiliates of the centre                                                                                                     |         |   |   |   |   |                        |   |   |   |   |
